# Supplementary material for: Clinical and Genomic Epidemiology of Coxsackievirus A21 and Enterovirus D68 in Homeless Shelters, King County, Washington, USA, 2019–2021
Source: PubMed Central journal article supplement (PMC11521184; doi:10.3201/eid3011.240687), 2024-11
Supplement: 24-0687-Techapp-s1.pdf [file 24-0687-Techapp-s1.pdf]

# Clinical and Genomic Epidemiology of Coxsackievirus A21 and Enterovirus D68 in Homeless Shelters, King County, Washington, USA, 2019–2021

## Appendix

### Supplemental methods

#### Data collection and multiplex PCR testing

Respiratory specimens were initially collected using midturbinate sterile nylon flocked swabs (Copan Diagnostics, FloqSwab 56380CS01) from October 1, 2019–July 22, 2020, and then subsequently from November 1, 2020–May 31, 2021. Anterior nares swabs (SteriPack, U.S. Cotton #3 60564RevB) were used from July 22, 2020–November 1, 2020, due to supply chain resource limitations. With the spread of SARS-CoV-2, specimen collection was changed to a study staff-supervised self-collected swabs. Comparability of a self-collected mid-turbinate swab to clinician-obtained nasopharyngeal sample has previously been described (1,2).

All nasal swabs and environmental samples were stored at 4°C in universal transport media. Samples were purified for total nucleic acids using the Roche MagnaPure 96 DNA and viral NA small volume kit, Viral NA Universal SV 4.0 protocol (200µL input, 50µL elution) and tested by RT-PCR for multiple viral pathogens using a custom arrayed platform including: enterovirus (pan-enterovirus; EV-D68), rhinovirus, influenza viruses (A, B and C), respiratory syncytial viruses (A&B), human parainfluenza viruses (1–4), human coronaviruses (HCoV), human metapneumovirus, human bocavirus, human parechovirus and adenovirus.

Further details on target strains and cross-reactivity for each assay used are detailed on the ThermoAssay Web site (<https://www.thermofisher.com/microbe-detection/taqman/query>). In particular, the EV-D68 (Thermo Assay ID: Vi06439669\_s1) primer cross-reacts to 16 other taxa

including: Enterovirus C, enterovirus A90, enterovirus A76, enterovirus C96, coxsackievirus A11, coxsackievirus A13, coxsackievirus A19, coxsackievirus A1, coxsackievirus A20, coxsackievirus A22, human enterovirus, coxsackievirus A21, human poliovirus 1, human poliovirus 2, coxsackievirus A24, and enterovirus C99.

Given this known cross-reactivity, all swabs initially positive on the enterovirus-specific primers (Thermo Assay ID: Vi06439631\_s1, Vi06439669\_s1) were reviewed by laboratory staff using a process recommended by the manufacturer to ensure quality in the differentiation between enterovirus and rhinovirus. Staff evaluated each sample based on the degree of enterovirus amplification, enterovirus Crt values, and the degree of rhinovirus amplification. Swabs initially called enterovirus positive that had low enterovirus amplification ( $\Delta RN < 1000$ ), high enterovirus Crt value ( $> 20$ ), and/or high rhinovirus amplification ( $Crt < 19$ ,  $\Delta RN > 1500$ ) were called enterovirus-negative and the results were adjusted based on this additional review. RN is a measure of the intensity of a marker dye in a PCR mix and the  $\Delta RN$  refers to the change in RN that occurs when the PCR is run. RN increases when a target is amplified by PCR. A low  $\Delta RN$  occurs if a target is not present in the PCR mix or if it is present at very low concentrations as the PCR cannot amplify the target sequence without a template. Samples that were true positives for both rhinovirus and enterovirus had high levels of amplifications and low Crt values for both viruses.

Beginning November 23, 2020, the OpenArray platform identified HCoV by species including HCoV-HKU1, HCoV-NL63, HCoV-229E and HCoV-OC43. Beginning February 25, 2020, samples were tested for SARS-CoV-2 in real-time by a multiplexed RT-PCR assay targeting SARS-CoV-2 Orf1b and human RNase P genes in samples collected through March 18, 2020, and a multiplexed RT-PCR assay targeting SARS-CoV-2 Orf1b and S genes with FAM Fluor and the human RNase P gene with VIC or HEX fluor from March 19, 2020, onward. Specimens collected from January 1, 2020-February 24, 2020, were tested retrospectively using a single replicate Orf1b and RNase P multiplexed RT-PCR research assay to detect SARS-CoV-2 Orf1b. An OpenArray relative cycle threshold (Crt) value was calculated for virus-positive samples.

Our custom arrayed RT-PCR panel did not include human bocavirus or human parechovirus during the latter part of the study and may have missed detection of these viruses.

## Genomic sequencing and analysis

Briefly, raw reads were trimmed with Trimmomatic (v0.39) using the settings ILLUMINACLIP:2:30:10:1:true, SLIDINGWINDOW: 4:20, LEADING: 3, TRAILING: 3, MINLEN: 35 and mapped to a multi-fasta reference containing complete genomes of multiple respiratory viruses using BMap (v38.96). The reference with the highest median coverage was selected and trimmed reads were mapped again to the selected reference using BMap with a strict max indel of 9. The resulting bam was used to call a consensus genome using Samtools (v.1.15) and iVar (v1.3.1) with minimum per-base coverage of 5x, minimum base quality of 20, and minimum frequency threshold of 0.6. Regions with less than the minimum coverage were called Ns. This process was iterated for a total of three times and leading and trailing Ns were trimmed to generate a final consensus.

## References

1. McCulloch DJ, Kim AE, Wilcox NC, Logue JK, Greninger AL, Englund JA, et al. Comparison of unsupervised home self-collected midnasal swabs with clinician-collected nasopharyngeal swabs for detection of SARS-CoV-2 infection. *JAMA Netw Open*. 2020;3:e2016382. [PubMed https://doi.org/10.1001/jamanetworkopen.2020.16382](https://doi.org/10.1001/jamanetworkopen.2020.16382)
2. Kim AE, Brandstetter E, Wilcox N, Heimonen J, Graham C, Han PD, et al. Evaluating specimen quality and results from a community-wide, home-based respiratory surveillance study. *J Clin Microbiol*. 2021;59:e02934–20. [PubMed https://doi.org/10.1128/JCM.02934-20](https://doi.org/10.1128/JCM.02934-20)

**Appendix Table 1.** Sequence data deposited to NCBI GenBank and SRA (Bioproject PRJNA1029161).\*

| Strain                       | collection_date | organism              | GenBank  | BioSample    | SRA         |
|------------------------------|-----------------|-----------------------|----------|--------------|-------------|
| RV-C17/USA/WA-UW-087df/2020  | 2020-11         | Rhinovirus C17        | OR726586 | SAMN37865749 | SRR26415519 |
| RV-C17/USA/WA-UW-1a6c3/2020  | 2020-11         | Rhinovirus C17        | OR726585 | SAMN37865750 | SRR26415518 |
| CV-A21/USA/WA-UW-76354/2019  | 2019-10         | Coxsackievirus A21    | OR726590 | SAMN37865755 | SRR26415504 |
| CV-A21/USA/WA-UW-7c271/2019  | 2019-10         | Coxsackievirus A21    | OR726589 | SAMN37865757 | SRR26415502 |
| RV-C1/USA/WA-UW-c9756/2021   | 2021-01         | Rhinovirus C1         | OR726587 | SAMN37865760 | SRR26415516 |
| CV-A21/USA/WA-UW-f0a35/2019  | 2019-10         | Coxsackievirus A21    | OR726591 | SAMN37865762 | SRR26415514 |
| CV-A21/USA/WA-UW-fd6df/2019  | 2019-10         | Coxsackievirus A21    | OR726592 | SAMN37865766 | SRR26415510 |
| RV-C/USA/WA-UW-ff39d/2021    | 2021-01         | Rhinovirus C          | OR726588 | SAMN37865767 | SRR26415509 |
| HAdV-C5/USA/WA-UW-6bd44/2021 | 2021-01         | Human adenovirus 5    | OR728260 | SAMN37865664 | SRR26445869 |
| HPeV-1B/USA/WA-UW-6bd44/2021 | 2021-01         | Human parechovirus 1B | OR728261 | SAMN37865665 | SRR26445869 |
| PyV/USA/WA-UW-6bd44/2021     | 2021-01         | Polyomavirus sp.      | OR728262 | SAMN37865666 | SRR26445869 |
| CV-A21/USA/WA-UW-6fbc5/2019  | 2019-10         | Coxsackievirus A21    | OR833019 | SAMN38286755 | SRR26856195 |
| CV-A21/USA/WA-UW-2cf8d/2019  | 2019-10         | Coxsackievirus A21    | OR833016 | SAMN38286756 | SRR26856194 |
| CV-A21/USA/WA-UW-26b08/2019  | 2019-12         | Coxsackievirus A21    | OR833030 | SAMN38286757 | SRR26856183 |
| EV-D68/USA/WA-UW-2c8da/2019  | 2019-10         | Enterovirus D68       | OR833015 | SAMN38286758 | SRR26856172 |
| CV-A21/USA/WA-UW-74951/2019  | 2019-10         | Coxsackievirus A21    | OR833046 | SAMN38286759 | SRR26856161 |
| CV-A21/USA/WA-UW-024bb/2020  | 2020-01         | Coxsackievirus A21    | OR833029 | SAMN38286760 | SRR26856150 |
| CV-A21/USA/WA-UW-4c9f1/2019  | 2019-11         | Coxsackievirus A21    | OR833018 | SAMN38286761 | SRR26856145 |
| CV-A21/USA/WA-UW-c93c6/2019  | 2019-12         | Coxsackievirus A21    | OR833052 | SAMN38286762 | SRR26856144 |
| CV-A21/USA/WA-UW-8b43d/2019  | 2019-10         | Coxsackievirus A21    | OR833024 | SAMN38286763 | SRR26856143 |
| CV-A21/USA/WA-UW-b7d06/2019  | 2019-11         | Coxsackievirus A21    | OR833049 | SAMN38286764 | SRR26856142 |
| CV-A21/USA/WA-UW-8014b/2019  | 2019-10         | Coxsackievirus A21    | OR833043 | SAMN38286765 | SRR26856193 |
| CV-A21/USA/WA-UW-60c43/2019  | 2019-11         | Coxsackievirus A21    | OR833034 | SAMN38286766 | SRR26856192 |
| CV-A21/USA/WA-UW-fab63/2019  | 2019-10         | Coxsackievirus A21    | OR833059 | SAMN38286767 | SRR26856191 |
| CV-A21/USA/WA-UW-db519/2019  | 2019-10         | Coxsackievirus A21    | OR833054 | SAMN38286768 | SRR26856190 |
| CV-A21/USA/WA-UW-08763/2020  | 2020-01         | Coxsackievirus A21    | OR833044 | SAMN38286769 | SRR26856189 |
| CV-A21/USA/WA-UW-f5679/2019  | 2019-11         | Coxsackievirus A21    | OR833058 | SAMN38286770 | SRR26856188 |
| EV-D68/USA/WA-UW-0b718/2019  | 2019-10         | Enterovirus D68       | OR833014 | SAMN38286771 | SRR26856187 |
| CV-A21/USA/WA-UW-2965a/2019  | 2019-11         | Coxsackievirus A21    | OR833039 | SAMN38286772 | SRR26856186 |
| CV-A21/USA/WA-UW-9c594/2020  | 2020-02         | Coxsackievirus A21    | OR833027 | SAMN38286773 | SRR26856185 |
| EV-D68/USA/WA-UW-44dd6/2019  | 2019-11         | Enterovirus D68       | OR833032 | SAMN38286774 | SRR26856184 |
| CV-A21/USA/WA-UW-274e8/2019  | 2019-11         | Coxsackievirus A21    | OR833036 | SAMN38286775 | SRR26856182 |
| CV-A21/USA/WA-UW-13009/2020  | 2020-01         | Coxsackievirus A21    | OR833045 | SAMN38286776 | SRR26856181 |
| CV-A21/USA/WA-UW-e0acd/2019  | 2019-10         | Coxsackievirus A21    | OR833056 | SAMN38286777 | SRR26856180 |
| CV-A21/USA/WA-UW-7d205/2019  | 2019-11         | Coxsackievirus A21    | OR833021 | SAMN38286778 | SRR26856179 |
| CV-A21/USA/WA-UW-085c7/2019  | 2019-10         | Coxsackievirus A21    | OR833035 | SAMN38286779 | SRR26856178 |
| CV-A21/USA/WA-UW-50f62/2020  | 2020-01         | Coxsackievirus A21    | OR833033 | SAMN38286780 | SRR26856177 |
| EV-D68/USA/WA-UW-dea74/2019  | 2019-10         | Enterovirus D68       | OR833055 | SAMN38286781 | SRR26856176 |
| EV-D68/USA/WA-UW-b4a24/2019  | 2019-10         | Enterovirus D68       | OR833048 | SAMN38286782 | SRR26856175 |
| CV-A21/USA/WA-UW-517e0/2019  | 2019-10         | Coxsackievirus A21    | OR833037 | SAMN38286783 | SRR26856174 |
| CV-A21/USA/WA-UW-5495c/2019  | 2019-10         | Coxsackievirus A21    | OR833042 | SAMN38286784 | SRR26856173 |
| CV-A21/USA/WA-UW-bc435/2019  | 2019-11         | Coxsackievirus A21    | OR833051 | SAMN38286787 | SRR26856169 |
| CV-A21/USA/WA-UW-018ec/2019  | 2019-10         | Coxsackievirus A21    | OR833028 | SAMN38286788 | SRR26856168 |
| CV-A21/USA/WA-UW-9a01e/2019  | 2019-10         | Coxsackievirus A21    | OR833026 | SAMN38286789 | SRR26856167 |
| CV-A21/USA/WA-UW-feed7/2019  | 2019-11         | Coxsackievirus A21    | OR833060 | SAMN38286790 | SRR26856166 |
| CV-A21/USA/WA-UW-b9e2a/2019  | 2019-11         | Coxsackievirus A21    | OR833050 | SAMN38286791 | SRR26856165 |
| EV-D68/USA/WA-UW-08a64/2019  | 2019-10         | Enterovirus D68       | OR833023 | SAMN38286792 | SRR26856164 |
| CV-A21/USA/WA-UW-8c83c/2019  | 2019-11         | Coxsackievirus A21    | OR833025 | SAMN38286793 | SRR26856163 |

| Strain                         | collection_date | organism               | GenBank  | BioSample    | SRA         |
|--------------------------------|-----------------|------------------------|----------|--------------|-------------|
| HCoV-NL63/USA/WA-UW-15b1d/2019 | 2019-12         | Human coronavirus NL63 | OR833061 | SAMN38286794 | SRR26856162 |
| CV-A21/USA/WA-UW-e5632/2019    | 2019-10         | Coxsackievirus A21     | OR833057 | SAMN38286795 | SRR26856160 |
| CV-A21/USA/WA-UW-5072b/2019    | 2019-11         | Coxsackievirus A21     | OR833041 | SAMN38286796 | SRR26856159 |
| CV-A21/USA/WA-UW-7b0c5/2019    | 2019-10         | Coxsackievirus A21     | OR833020 | SAMN38286797 | SRR26856158 |
| CV-A21/USA/WA-UW-3048d/2019    | 2019-11         | Coxsackievirus A21     | OR833040 | SAMN38286798 | SRR26856157 |
| CV-A21/USA/WA-UW-d0d44/2019    | 2019-10         | Coxsackievirus A21     | OR833053 | SAMN38286800 | SRR26856155 |
| CV-A21/USA/WA-UW-34db8/2019    | 2019-10         | Coxsackievirus A21     | OR833031 | SAMN38286801 | SRR26856154 |
| CV-A21/USA/WA-UW-a04b8/2019    | 2019-10         | Coxsackievirus A21     | OR833047 | SAMN38286802 | SRR26856153 |
| EV-D68/USA/WA-UW-a0771/2019    | 2019-10         | Enterovirus D68        | PP025331 | SAMN38286803 | SRR26856152 |
| CV-A21/USA/WA-UW-706a1/2019    | 2019-11         | Coxsackievirus A21     | OR833038 | SAMN38286804 | SRR26856151 |
| CV-A21/USA/WA-UW-7dfa3/2019    | 2019-11         | Coxsackievirus A21     | OR833022 | SAMN38286805 | SRR26856149 |
| CV-A21/USA/WA-UW-2dbc6/2019    | 2019-11         | Coxsackievirus A21     | OR833017 | SAMN38286808 | SRR26856146 |

\*18 of the 76 sequenced swabs were not submitted to GenBank because their consensus genome was either too short, contained high percentage of the ambiguous base N, or had assembly/annotation issues.

**Appendix Table 2.** Demographic and clinical characteristics among participants with specimens, October 2019 - May 2021\*

| Age (years), Median [Min, Max]              | 47 [23, 72]              | 53 [37, 58] | 49 [23, 72] |
|---------------------------------------------|--------------------------|-------------|-------------|
| Age group (years)                           |                          |             |             |
| <18                                         | 0 (0.0%)                 | 0 (0.0%)    | 0 (0.0%)    |
| 18–24                                       | 3 (7.7%)                 | 0 (0.0%)    | 3 (6.8%)    |
| 25–49                                       | 19 (48.7%)               | 1 (20.0%)   | 20 (45.5%)  |
| 50–64                                       | 15 (38.5%)               | 4 (80.0%)   | 19 (43.2%)  |
| 65+                                         | 2 (5.1%)                 | 0 (0.0%)    | 2 (4.5%)    |
| Sex (biologic)                              |                          |             |             |
| Male                                        | 35 (89.7%)               | 5 (100.0%)  | 40 (90.9%)  |
| Female                                      | 3 (7.7%)                 | 0 (0.0%)    | 3 (6.8%)    |
| Other                                       | 0 (0.0%)                 | 0 (0.0%)    | 0 (0.0%)    |
| Prefer not to say                           | 1 (2.6%)                 | 0 (0.0%)    | 1 (2.3%)    |
| Pregnant                                    | 0 (0.0%)                 | 0 (0.0%)    | 0 (0.0%)    |
| Race                                        |                          |             |             |
| American Indian/Alaska Native               | 1 (2.6%)                 | 0 (0.0%)    | 1 (2.3%)    |
| Asian                                       | 0 (0.0%)                 | 0 (0.0%)    | 0 (0.0%)    |
| Black or African American                   | 8 (20.5%)                | 3 (60.0%)   | 11 (25.0%)  |
| Native Hawaiian/Other Pacific Islander      | 1 (2.6%)                 | 0 (0.0%)    | 1 (2.3%)    |
| White                                       | 16 (41.0%)               | 2 (40.0%)   | 18 (40.9%)  |
| Multiracial                                 | 4 (10.3%)                | 0 (0.0%)    | 4 (9.1%)    |
| Other                                       | 5 (12.8%)                | 0 (0.0%)    | 5 (11.4%)   |
| Prefer not to say                           | 4 (10.3%)                | 0 (0.0%)    | 4 (9.1%)    |
| Hispanic ethnicity                          | 4 (10.3%)                | 0 (0.0%)    | 4 (9.1%)    |
| Shelter staff                               | 0 (0.0%)                 | 0 (0.0%)    | 0 (0.0%)    |
| Employed                                    | 8 (20.5%)                | 2 (40.0%)   | 10 (22.7%)  |
| Chronic homelessness <sup>¶</sup>           | 25 (64.1%)               | 3 (60.0%)   | 28 (63.6%)  |
| Current tobacco smoker <sup>#</sup>         | 29 (74.4%)               | 4 (80.0%)   | 33 (75.0%)  |
| Any comorbidities <sup>**</sup>             | 22 (56.4%)               | 0 (0.0%)    | 22 (50.0%)  |
| Asthma                                      | 9 (23.1%)                | 0 (0.0%)    | 9 (20.5%)   |
| Cancer                                      | 3 (7.7%)                 | 0 (0.0%)    | 3 (6.8%)    |
| Cardiovascular disease                      | 2 (5.1%)                 | 0 (0.0%)    | 2 (4.5%)    |
| Chronic obstructive pulmonary disease       | 6 (15.4%)                | 0 (0.0%)    | 6 (13.6%)   |
| Diabetes mellitus                           | 3 (7.7%)                 | 0 (0.0%)    | 3 (6.8%)    |
| Hepatic disease                             | 2 (5.1%)                 | 0 (0.0%)    | 2 (4.5%)    |
| Immunosuppression                           | 3 (7.7%)                 | 0 (0.0%)    | 3 (6.8%)    |
| Neurologic disease                          | 6 (15.4%)                | 0 (0.0%)    | 6 (13.6%)   |
| Non-enteroviruses co-detected <sup>††</sup> |                          |             |             |
| Any symptoms <sup>††</sup>                  | 38 (97.4%) <sup>¶¶</sup> | 5 (100.0%)  | 43 (97.7%)  |
| Runny nose                                  | 33 (84.6%)               | 5 (100.0%)  | 38 (86.4%)  |
| Cough                                       | 26 (66.7%)               | 5 (100.0%)  | 31 (70.5%)  |
| Sore throat                                 | 22 (56.4%)               | 1 (20.0%)   | 23 (52.3%)  |
| Muscle/body aches                           | 22 (56.4%)               | 1 (20.0%)   | 23 (52.3%)  |
| Fatigue                                     | 18 (46.2%)               | 2 (40.0%)   | 20 (45.5%)  |
| Headache                                    | 21 (53.8%)               | 1 (20.0%)   | 22 (50.0%)  |
| Nausea/vomiting                             | 15 (38.5%)               | 1 (20.0%)   | 16 (36.4%)  |
| Fever/feeling feverish                      | 10 (25.6%)               | 2 (40.0%)   | 12 (27.3%)  |
| Sweats                                      | 11 (28.2%)               | 1 (20.0%)   | 12 (27.3%)  |
| Chills                                      | 13 (33.3%)               | 0 (0.0%)    | 13 (29.5%)  |
| Trouble breathing                           | 11 (28.2%)               | 0 (0.0%)    | 11 (25.0%)  |
| Diarrhea                                    | 10 (25.6%)               | 0 (0.0%)    | 10 (22.7%)  |
| Ear pain                                    | 2 (5.1%)                 | 0 (0.0%)    | 2 (4.5%)    |
| Rash                                        | 2 (5.1%)                 | 0 (0.0%)    | 2 (4.5%)    |

**Appendix Table 3.** Demographic and clinical characteristics among participants with specimens, October 2019 - March 2020 (n = 1,699).\*

| Characteristics                | Enterovirus positive specimens       |                         | Enterovirus negative specimens      |                                       | Specimens overall (n = 1,699) <sup>§</sup> |
|--------------------------------|--------------------------------------|-------------------------|-------------------------------------|---------------------------------------|--------------------------------------------|
|                                | Coxsackievirus (n = 48) <sup>†</sup> | Enterovirus D68 (n = 7) | ORV <sup>‡</sup> Positive (n = 370) | ORV <sup>‡</sup> Negative (n = 1,274) |                                            |
| Age (years), Median [Min, Max] | 46 [1, 72]                           | 53 [37, 58]             | 42 [0, 81]                          | 49 [0, 84]                            | 48 [0, 84]                                 |
| Age group (years)              |                                      |                         |                                     |                                       |                                            |
| <18                            | 3 (6.3%)                             | 0 (0.0%)                | 60 (16.3%)                          | 70 (5.5%)                             | 133 (7.8%)                                 |
| 18–24                          | 3 (6.3%)                             | 0 (0.0%)                | 33 (9.0%)                           | 87 (6.8%)                             | 123 (7.3%)                                 |
| 25–49                          | 21 (43.8%)                           | 1 (14.3%)               | 131 (35.6%)                         | 489 (38.4%)                           | 642 (37.9%)                                |
| 50–64                          | 18 (37.5%)                           | 6 (85.7%)               | 123 (33.4%)                         | 559 (43.9%)                           | 706 (41.6%)                                |
| 65+                            | 3 (6.3%)                             | 0 (0.0%)                | 21 (5.7%)                           | 68 (5.3%)                             | 92 (5.4%)                                  |
| Sex (biologic)                 |                                      |                         |                                     |                                       |                                            |

| Characteristics                             | Enterovirus positive specimens       |                         | Enterovirus negative specimens      |                                       | Specimens overall (n = 1,699) <sup>§</sup> |
|---------------------------------------------|--------------------------------------|-------------------------|-------------------------------------|---------------------------------------|--------------------------------------------|
|                                             | Coxsackievirus (n = 48) <sup>†</sup> | Enterovirus D68 (n = 7) | ORV <sup>‡</sup> Positive (n = 370) | ORV <sup>‡</sup> Negative (n = 1,274) |                                            |
| Male                                        | 42 (87.5%)                           | 7 (100.0%)              | 236 (63.8%)                         | 940 (73.8%)                           | 1,225 (72.1%)                              |
| Female                                      | 5 (10.4%)                            | 0 (0.0%)                | 131 (35.4%)                         | 329 (25.8%)                           | 465 (27.4%)                                |
| Other                                       | 0 (0.0%)                             | 0 (0.0%)                | 2 (0.5%)                            | 2 (0.2%)                              | 4 (0.2%)                                   |
| Prefer not to say                           | 1 (2.1%)                             | 0 (0.0%)                | 1 (0.3%)                            | 3 (0.2%)                              | 5 (0.3%)                                   |
| Pregnant                                    | 0 (0.0%)                             | 0 (0.0%)                | 6 (1.6%)                            | 13 (1.0%)                             | 19 (1.1%)                                  |
| Race                                        |                                      |                         |                                     |                                       |                                            |
| American Indian/Alaska Native               | 1 (2.1%)                             | 0 (0.0%)                | 8 (2.2%)                            | 54 (4.2%)                             | 63 (3.7%)                                  |
| Asian                                       | 0 (0.0%)                             | 0 (0.0%)                | 3 (0.8%)                            | 24 (1.9%)                             | 27 (1.6%)                                  |
| Black or African American                   | 8 (16.7%)                            | 5 (71.4%)               | 97 (26.2%)                          | 307 (24.1%)                           | 417 (24.5%)                                |
| Native Hawaiian/Other Pacific Islander      | 1 (2.1%)                             | 0 (0.0%)                | 7 (1.9%)                            | 15 (1.2%)                             | 23 (1.4%)                                  |
| White                                       | 20 (41.7%)                           | 2 (28.6%)               | 167 (45.1%)                         | 592 (46.5%)                           | 781 (46.0%)                                |
| Multiracial                                 | 7 (14.6%)                            | 0 (0.0%)                | 53 (14.3%)                          | 116 (9.1%)                            | 176 (10.4%)                                |
| Other                                       | 7 (14.6%)                            | 0 (0.0%)                | 25 (6.8%)                           | 114 (8.9%)                            | 146 (8.6%)                                 |
| Prefer not to say                           | 4 (8.3%)                             | 0 (0.0%)                | 10 (2.7%)                           | 52 (4.1%)                             | 66 (3.9%)                                  |
| Hispanic ethnicity                          | 5 (10.4%)                            | 0 (0.0%)                | 45 (12.2%)                          | 132 (10.4%)                           | 182 (10.7%)                                |
| Shelter staff                               | 0 (0.0%)                             | 0 (0.0%)                | 0 (0.0%)                            | 0 (0.0%)                              | 0 (0.0%)                                   |
| Employed                                    | 10 (20.8%)                           | 3 (42.9%)               | 54 (14.6%)                          | 236 (18.5%)                           | 303 (17.8%)                                |
| Chronic homelessness <sup>¶</sup>           | 31 (64.6%)                           | 4 (57.1%)               | 132 (35.7%)                         | 578 (45.4%)                           | 745 (43.8%)                                |
| Current tobacco smoker <sup>#</sup>         | 34 (70.8%)                           | 5 (71.4%)               | 204 (55.1%)                         | 814 (63.9%)                           | 1057 (62.2%)                               |
| Any comorbidities <sup>**</sup>             | 25 (52.1%)                           | 0 (0.0%)                | 140 (37.8%)                         | 548 (43.0%)                           | 713 (42.0%)                                |
| Asthma                                      | 9 (18.8%)                            | 0 (0.0%)                | 63 (17.0%)                          | 207 (16.2%)                           | 279 (16.4%)                                |
| Cancer                                      | 3 (6.3%)                             | 0 (0.0%)                | 6 (1.6%)                            | 31 (2.4%)                             | 40 (2.4%)                                  |
| Cardiovascular disease                      | 3 (6.3%)                             | 0 (0.0%)                | 21 (5.7%)                           | 68 (5.3%)                             | 92 (5.4%)                                  |
| Chronic obstructive pulmonary disease       | 7 (14.6%)                            | 0 (0.0%)                | 41 (11.1%)                          | 160 (12.6%)                           | 208 (12.2%)                                |
| Diabetes mellitus                           | 4 (8.3%)                             | 0 (0.0%)                | 50 (13.5%)                          | 151 (11.9%)                           | 205 (12.1%)                                |
| Hepatic disease                             | 2 (4.2%)                             | 0 (0.0%)                | 12 (3.2%)                           | 82 (6.4%)                             | 96 (5.7%)                                  |
| Immunosuppression                           | 3 (6.3%)                             | 0 (0.0%)                | 8 (2.2%)                            | 29 (2.3%)                             | 40 (2.4%)                                  |
| Neurologic disease                          | 7 (14.6%)                            | 0 (0.0%)                | 17 (4.6%)                           | 91 (7.1%)                             | 115 (6.8%)                                 |
| Non-enteroviruses co-detected <sup>††</sup> | 4 (8.3%)                             | 0 (0.0%)                | 370 (100.0%)                        | 0 (0.0%)                              | 374 (22.0%)                                |
| Any symptoms <sup>††</sup>                  | 47 (97.9%)                           | 7 (100.0%)              | 340 (91.9%)                         | 1,107 (86.9%)                         | 1,501 (88.3%)                              |
| Runny nose                                  | 41 (85.4%)                           | 7 (100.0%)              | 291 (78.6%)                         | 855 (67.1%)                           | 1,194 (70.3%)                              |
| Cough                                       | 33 (68.8%)                           | 7 (100.0%)              | 262 (70.8%)                         | 772 (60.6%)                           | 1,074 (63.2%)                              |
| Sore throat                                 | 26 (54.2%)                           | 1 (14.3%)               | 150 (40.5%)                         | 437 (34.3%)                           | 614 (36.1%)                                |
| Muscle/body aches                           | 24 (50.0%)                           | 1 (14.3%)               | 151 (40.8%)                         | 540 (42.4%)                           | 716 (42.1%)                                |
| Fatigue                                     | 22 (45.8%)                           | 3 (42.9%)               | 153 (41.4%)                         | 515 (40.4%)                           | 693 (40.8%)                                |
| Headache                                    | 22 (45.8%)                           | 1 (14.3%)               | 145 (39.2%)                         | 457 (35.9%)                           | 625 (36.8%)                                |
| Nausea/vomiting                             | 20 (41.7%)                           | 1 (14.3%)               | 95 (25.7%)                          | 290 (22.8%)                           | 406 (23.9%)                                |
| Fever/feeling feverish                      | 14 (29.2%)                           | 2 (28.6%)               | 117 (31.6%)                         | 349 (27.4%)                           | 482 (28.4%)                                |
| Sweats                                      | 15 (31.3%)                           | 2 (28.6%)               | 90 (24.3%)                          | 322 (25.3%)                           | 429 (25.3%)                                |
| Chills                                      | 17 (35.4%)                           | 0 (0.0%)                | 100 (27.0%)                         | 340 (26.7%)                           | 457 (26.9%)                                |
| Trouble breathing                           | 12 (25.0%)                           | 0 (0.0%)                | 88 (23.8%)                          | 239 (18.8%)                           | 339 (20.0%)                                |
| Diarrhea                                    | 12 (25.0%)                           | 0 (0.0%)                | 68 (18.4%)                          | 185 (14.5%)                           | 265 (15.6%)                                |
| Ear pain                                    | 3 (6.3%)                             | 0 (0.0%)                | 30 (8.1%)                           | 96 (7.5%)                             | 129 (7.6%)                                 |
| Rash                                        | 3 (6.3%)                             | 0 (0.0%)                | 22 (5.9%)                           | 90 (7.1%)                             | 115 (6.8%)                                 |

\*Participants could enroll in the study and have a specimen collected once per week, or additionally if new signs or symptoms developed

<sup>†</sup>Includes 45 coxsackievirus A21 specimens among adults; 1 coxsackievirus A4 and 2 coxsackievirus A6 cases among symptomatic children <10 y in family shelters

<sup>‡</sup>ORV = Other respiratory virus-positive

<sup>§</sup>Excludes 18 enterovirus unknown specimens (enterovirus detected in initial PCR testing but unable to be sequenced)

<sup>¶</sup>Homeless ≥1 y

<sup>#</sup>Only asked for participants aged 12 y+

<sup>\*\*</sup>Any comorbidities include: asthma, cancer, cardiovascular disease, chronic obstructive pulmonary disease, diabetes mellitus, hepatic disease, immunosuppression, neurologic disease

<sup>††</sup>At time of specimen collection

<sup>††</sup>2 participants with coxsackievirus A21 and rhinovirus co-detected; 1 participant with coxsackievirus A4 and both rhinovirus and RSV-A co-detected; 1 participant with coxsackievirus A6 and rhinovirus co-detected

**Appendix Table 4.** Demographic and clinical characteristics among participants with specimens, April 2020 - May 2021 (n = 12,747).\*

| Characteristics                             | Enterovirus negative specimens        |                                        | Specimens overall (n = 12,747) |
|---------------------------------------------|---------------------------------------|----------------------------------------|--------------------------------|
|                                             | ORV <sup>†</sup> Positive (n = 1,003) | ORV <sup>†</sup> Negative (n = 11,744) |                                |
| Age (years), Median [Min, Max]              | 24 [0, 85]                            | 39 [0, 97]                             | 38 [0, 97]                     |
| Age group (years)                           |                                       |                                        |                                |
| <18                                         | 379 (37.8%)                           | 1,524 (13.0%)                          | 1,903 (14.9%)                  |
| 18–24                                       | 126 (12.6%)                           | 1,317 (11.2%)                          | 1,443 (11.3%)                  |
| 25–49                                       | 324 (32.3%)                           | 5,174 (44.1%)                          | 5,498 (43.1%)                  |
| 50–64                                       | 143 (14.3%)                           | 2,944 (25.1%)                          | 3,087 (24.2%)                  |
| 65+                                         | 31 (3.1%)                             | 785 (6.7%)                             | 816 (6.4%)                     |
| Sex (biologic)                              |                                       |                                        |                                |
| Male                                        | 565 (56.4%)                           | 6,727 (57.3%)                          | 7,293 (57.2%)                  |
| Female                                      | 421 (42.0%)                           | 4,847 (41.3%)                          | 5,268 (41.3%)                  |
| Other                                       | 4 (0.4%)                              | 47 (0.4%)                              | 51 (0.4%)                      |
| Prefer not to say                           | 12 (1.2%)                             | 121 (1.0%)                             | 133 (1.0%)                     |
| Pregnant                                    | 0 (0.0%)                              | 9 (0.1%)                               | 9 (0.1%)                       |
| Race                                        |                                       |                                        |                                |
| American Indian/Alaska Native               | 32 (3.2%)                             | 373 (3.2%)                             | 405 (3.2%)                     |
| Asian                                       | 11 (1.1%)                             | 377 (3.2%)                             | 388 (3.0%)                     |
| Black or African American                   | 305 (30.4%)                           | 3,882 (33.1%)                          | 4,187 (32.9%)                  |
| Native Hawaiian/Other Pacific Islander      | 108 (10.8%)                           | 458 (3.9%)                             | 566 (4.4%)                     |
| White                                       | 307 (30.6%)                           | 4,380 (37.4%)                          | 4,687 (36.8%)                  |
| Multiracial                                 | 74 (7.4%)                             | 825 (7.0%)                             | 899 (7.1%)                     |
| Other                                       | 36 (3.6%)                             | 576 (4.9%)                             | 612 (4.8%)                     |
| Prefer not to say                           | 130 (13.0%)                           | 848 (7.2%)                             | 978 (7.7%)                     |
| Hispanic ethnicity                          | 186 (18.5%)                           | 1,508 (12.8%)                          | 1,694 (13.3%)                  |
| Shelter staff                               | 130 (13.0%)                           | 3,029 (25.8%)                          | 3,159 (24.8%)                  |
| Employed                                    | 154 (15.4%)                           | 2,099 (17.9%)                          | 2,253 (17.7%)                  |
| Chronic homelessness <sup>‡</sup>           | 215 (21.4%)                           | 2,598 (22.1%)                          | 2,813 (22.1%)                  |
| Current tobacco smoker <sup>¶</sup>         | 302 (30.1%)                           | 5,106 (43.5%)                          | 5,408 (42.4%)                  |
| Any comorbidities <sup>#</sup>              | 173 (17.2%)                           | 3,091 (26.3%)                          | 3,264 (25.6%)                  |
| Asthma                                      | 101 (10.1%)                           | 1,444 (12.3%)                          | 1,545 (12.1%)                  |
| Cancer                                      | 10 (1.0%)                             | 206 (1.8%)                             | 216 (1.7%)                     |
| Cardiovascular disease                      | 15 (1.5%)                             | 395 (3.4%)                             | 410 (3.2%)                     |
| Chronic obstructive pulmonary disease       | 29 (2.9%)                             | 524 (4.5%)                             | 553 (4.3%)                     |
| Diabetes mellitus                           | 52 (5.2%)                             | 994 (8.5%)                             | 1,046 (8.2%)                   |
| Hepatic disease                             | 8 (0.8%)                              | 306 (2.6%)                             | 314 (2.5%)                     |
| Immunosuppression                           | 7 (0.7%)                              | 136 (1.2%)                             | 143 (1.1%)                     |
| Neurologic disease                          | 3 (0.3%)                              | 23 (0.2%)                              | 26 (0.2%)                      |
| Non-enteroviruses co-detected <sup>**</sup> | 1,003 (100%)                          | 0 (0.0%)                               | 1,003 (7.9%)                   |
| Any symptoms <sup>**</sup>                  | 125 (12.5%)                           | 1,117 (9.5%)                           | 1,242 (9.7%)                   |
| Runny nose                                  | 65 (6.5%)                             | 437 (3.7%)                             | 502 (3.9%)                     |
| Cough                                       | 51 (5.1%)                             | 310 (2.6%)                             | 361 (2.8%)                     |
| Sore throat                                 | 33 (3.3%)                             | 234 (2.0%)                             | 267 (2.1%)                     |
| Muscle/body aches                           | 18 (1.8%)                             | 180 (1.5%)                             | 198 (1.6%)                     |
| Fatigue                                     | 14 (1.4%)                             | 240 (2.0%)                             | 254 (2.0%)                     |
| Headache                                    | 19 (1.9%)                             | 259 (2.2%)                             | 278 (2.2%)                     |
| Nausea/vomiting                             | 32 (3.2%)                             | 217 (1.8%)                             | 249 (2.0%)                     |
| Fever/feeling feverish                      | 9 (0.9%)                              | 115 (1.0%)                             | 124 (1.0%)                     |
| Sweats                                      | 8 (0.8%)                              | 110 (0.9%)                             | 118 (0.9%)                     |
| Chills                                      | 6 (0.6%)                              | 110 (0.9%)                             | 116 (0.9%)                     |
| Trouble breathing                           | 14 (1.4%)                             | 113 (1.0%)                             | 127 (1.0%)                     |
| Diarrhea                                    | 4 (0.4%)                              | 114 (1.0%)                             | 118 (0.9%)                     |
| Ear pain                                    | 7 (0.7%)                              | 52 (0.4%)                              | 59 (0.5%)                      |
| Rash                                        | 3 (0.3%)                              | 36 (0.3%)                              | 39 (0.3%)                      |

\*Participants could enroll in the study and have a specimen collected once per week, or additionally if new signs or symptoms developed

<sup>†</sup>ORV = Other respiratory virus-positive

<sup>‡</sup>Homeless  $\geq 1$  y

<sup>¶</sup>Only asked for participants aged 12 y+

<sup>#</sup>Any comorbidities include: asthma, cancer, cardiovascular disease, chronic obstructive pulmonary disease, diabetes mellitus, hepatic disease, immunosuppression, neurologic disease

<sup>\*\*</sup>At time of specimen collection



**Appendix Table 5.** Symptoms and impact on daily activity among shelter residents testing positive for coxsackievirus A21 and enterovirus D68, October 2019 - March 2020, Seattle King County, WA.

| Symptom at swab collection | Coxsackievirus A21<br>positive cases<br>(n = 39) | Symptom impact on daily activity* |            |            | Enterovirus D68<br>positive cases<br>(n = 5) | Symptom impact on daily activity* |           |           |
|----------------------------|--------------------------------------------------|-----------------------------------|------------|------------|----------------------------------------------|-----------------------------------|-----------|-----------|
|                            |                                                  | Mild                              | Moderate   | Severe     |                                              | Mild                              | Moderate  | Severe    |
| Runny nose                 | 33 (84.6%)                                       | 3 (7.7%)                          | 15 (38.5%) | 15 (38.5%) | 5 (100.0%)                                   | 4 (80.0%)                         | 1 (20.0%) | 0 (0.0%)  |
| Cough                      | 26 (66.7%)                                       | 9 (23.1%)                         | 12 (30.8%) | 5 (12.8%)  | 5 (100.0%)                                   | 0 (0.0%)                          | 4 (80.0%) | 1 (20.0%) |
| Sore throat                | 22 (56.4%)                                       | 7 (17.9%)                         | 9 (23.1%)  | 6 (15.4%)  | 1 (20.0%)                                    | 1 (20.0%)                         | 0 (0.0%)  | 0 (0.0%)  |
| Muscle/body aches          | 22 (56.4%)                                       | 3 (7.7%)                          | 16 (41.0%) | 3 (7.7%)   | 1 (20.0%)                                    | 1 (20.0%)                         | 0 (0.0%)  | 0 (0.0%)  |
| Fatigue                    | 18 (46.2%)                                       | 3 (7.7%)                          | 10 (25.6%) | 5 (12.8%)  | 2 (40.0%)                                    | 0 (0.0%)                          | 2 (40.0%) | 0 (0.0%)  |
| Headache                   | 21 (53.8%)                                       | 7 (17.9%)                         | 13 (33.3%) | 1 (2.6%)   | 1 (20.0%)                                    | 1 (20.0%)                         | 0 (0.0%)  | 0 (0.0%)  |
| Nausea/vomiting            | 15 (38.5%)                                       | 2 (5.1%)                          | 11 (28.2%) | 2 (5.1%)   | 1 (20.0%)                                    | 0 (0.0%)                          | 1 (20.0%) | 0 (0.0%)  |
| Fever/feeling feverish     | 10 (25.6%)                                       | 4 (10.3%)                         | 5 (12.8%)  | 1 (2.6%)   | 2 (40.0%)                                    | 1 (20.0%)                         | 1 (20.0%) | 0 (0.0%)  |
| Sweats                     | 11 (28.2%)                                       | 3 (7.7%)                          | 7 (17.9%)  | 1 (2.6%)   | 1 (20.0%)                                    | 0 (0.0%)                          | 1 (20.0%) | 0 (0.0%)  |
| Chills                     | 13 (33.3%)                                       | 4 (10.3%)                         | 6 (15.4%)  | 3 (7.7%)   | 0 (0.0%)                                     | 0 (0.0%)                          | 0 (0.0%)  | 0 (0.0%)  |
| Trouble breathing          | 11 (28.2%)                                       | 4 (10.3%)                         | 5 (12.8%)  | 2 (5.1%)   | 0 (0.0%)                                     | 0 (0.0%)                          | 0 (0.0%)  | 0 (0.0%)  |
| Diarrhea                   | 10 (25.6%)                                       | 5 (12.8%)                         | 5 (12.8%)  | 0 (0.0%)   | 0 (0.0%)                                     | 0 (0.0%)                          | 0 (0.0%)  | 0 (0.0%)  |
| Ear pain                   | 2 (5.1%)                                         | 2 (5.1%)                          | 0 (0.0%)   | 0 (0.0%)   | 0 (0.0%)                                     | 0 (0.0%)                          | 0 (0.0%)  | 0 (0.0%)  |
| Rash                       | 2 (5.1%)                                         | 1 (2.6%)                          | 1 (2.6%)   | 0 (0.0%)   | 0 (0.0%)                                     | 0 (0.0%)                          | 0 (0.0%)  | 0 (0.0%)  |
| Any symptoms               | 38 (97.4%)                                       | 2 (5.1%)                          | 16 (41.0%) | 20 (51.3%) | 5 (100.0%)                                   | 0 (0.0%)                          | 4 (80.0%) | 1 (20.0%) |

\*Mild = does not interfere with daily activity; Moderate = interferes with daily activity; Severe = prevents daily activity

**Appendix Table 6.** Demographic and clinical characteristics among unique residents testing positive for coxsackievirus A21 vs. enterovirus D68, October 3, 2019 - January 27, 2020

| Characteristics*                     | Coxsackievirus A21 (n = 39) | Enterovirus D68 (n = 5) | Overall (n = 44) †‡ |
|--------------------------------------|-----------------------------|-------------------------|---------------------|
| Symptom prevents daily activity      | 20 (51.3%)                  | 1 (20.0%)               | 21 (47.7%)          |
| Sought care                          |                             |                         |                     |
| Yes - Doctor's office or Urgent Care | 4 (10.3%)                   | 0 (0.0%)                | 4 (9.1%)            |
| Yes - Other                          | 8 (20.5%)                   | 1 (20.0%)               | 9 (20.5%)           |
| No                                   | 27 (69.2%)                  | 4 (80.0%)               | 31 (70.5%)          |
| Illness impact on                    |                             |                         |                     |
| Ability to take care of self/family  | 16 (41.0%)                  | 0 (0.0%)                | 16 (36.4%)          |
| Running errands                      | 11 (28.2%)                  | 2 (40.0%)               | 13 (29.5%)          |
| Exercise                             | 13 (33.3%)                  | 1 (20.0%)               | 14 (31.8%)          |
| Looking for work                     | 13 (33.3%)                  | 0 (0.0%)                | 13 (29.5%)          |
| Work                                 | 12 (30.8%)                  | 1 (20.0%)               | 13 (29.5%)          |
| School                               | 3 (7.7%)                    | 1 (20.0%)               | 4 (9.1%)            |
| Socializing                          | 19 (48.7%)                  | 3 (60.0%)               | 22 (50.0%)          |

\*At first positive specimen collection

†1 coxsackievirus A4 and 2 coxsackievirus A6 cases among symptomatic children <10 y in family shelters not shown

‡Excludes 18 enterovirus unknown specimens (enterovirus detected in initial PCR testing but unable to be sequenced)

**Appendix Table 7.** Coxsackievirus A21 and enterovirus D68 detection frequency among participant specimens overall and during viral circulation\*

| Coxsackvirus A21   | %                | 95% CI      |
|--------------------|------------------|-------------|
| Overall            | 0.3% (45/14,464) | 0.2% - 0.5% |
| During circulation | 3.0% (45/1,485)  | 1.9% - 4.8% |
| Enterovirus D68    |                  |             |
| Overall            | 0.0% (7/14,464)  | 0.0% - 0.1% |
| During circulation | 0.5% (7/1,485)   | 0.2% - 1.2% |

\*Overall detection frequency defined as October 2019 – May 2021 (across all data collection); Detection frequency during viral circulation defined as October 2019 – February 2020.

**Appendix Table 8.** Characteristics of sequenced shelter participant specimens and environmental samples

| Category  | Enterovirus-positive       |                |    | Enterovirus-negative | Enterovirus unknown | Total sequenced* |    |    |
|-----------|----------------------------|----------------|----|----------------------|---------------------|------------------|----|----|
|           | Enterovirus D68            | Coxsackievirus |    |                      |                     |                  |    |    |
|           |                            | A4             | A6 | A21                  |                     |                  |    |    |
| Total     | 8                          | 1              | 2  | 50                   | 12                  | 101              |    |    |
| Swab Type | Participant                | 7              | 1  | 2                    | 45                  | 10 <sup>†</sup>  | 18 | 83 |
|           | Unique Participant         | 5              | 1  | 2                    | 39                  |                  | 18 | 65 |
|           | Environmental              | 1              |    |                      | 5                   | 2 <sup>‡</sup>   | 10 | 18 |
| Shelter   | A (female, ≥18 y)          |                |    |                      | 1                   |                  |    | 1  |
|           | B (mixed gender, ≥18 y)    |                |    |                      | 3                   |                  | 4  | 7  |
|           | C (mixed gender, 18–25 y)  |                |    |                      | 5                   | 3                |    | 8  |
|           | D (mixed gender, all ages) |                | 1  | 1                    | 1                   | 5                | 7  | 15 |
|           | E (mixed gender, all ages) |                |    | 1                    |                     |                  | 2  | 3  |
|           | F (male, ≥18 y)            |                |    |                      | 2                   |                  | 2  | 4  |
|           | G (mixed gender, ≥18 y)    |                |    |                      |                     |                  | 1  | 1  |
|           | H (mixed gender, all ages) |                |    |                      |                     | 2                | 5  | 7  |
|           | L (mixed gender, ≥18 y)    | 2              |    |                      | 26                  | 2                | 7  | 37 |
|           | M (male, ≥50 y)            | 6              |    |                      | 12                  |                  |    | 18 |

\*We generated full genome sequences for 78% (n = 65/83) of participants' nasal swab specimens and 44% (n = 8/18) of environmental swab samples. Since we used an enrichment-based approach targeting multiple respiratory viruses, we also identified non-enteroviruses including rhinovirus A13 and C among participants and human adenovirus E4 and coronavirus HKU1 among environmental samples. Of note, we identified one participant with three co-detected viruses (adenovirus, KI polyomavirus, and parechovirus).

<sup>†</sup>Includes rhinovirus A13 (n = 2), Rhinovirus C (n = 7), and 1 co-detection of adenovirus 5, KI polyomavirus, and parechovirus 1B (n = 1)

<sup>‡</sup>Includes human adenovirus E4 (n = 1) and human coronavirus HKU1 (n = 1)

**Appendix Table 9.** Environmental samples detected via PCR targets by specific location in homeless shelters November 2019 - April 2020, King County, Washington, USA.

| Shelter location                                  | Enterovirus | Rhinovirus | Adenovirus | Human bocavirus | Human coronavirus | Human meta-pneumovirus | Human parainfluenza | Influenza | RSV     | Total samples collected |
|---------------------------------------------------|-------------|------------|------------|-----------------|-------------------|------------------------|---------------------|-----------|---------|-------------------------|
| Kitchen coffee pot or sugar container handle      | 2 (7%)      | 0 (0%)     | 6 (21%)    | 0 (0%)          | 0 (0%)            | 0 (0%)                 | 1 (3%)              | 1 (3%)    | 1 (3%)  | 29                      |
| Electronics- computer keyboards, game controllers | 2 (5%)      | 5 (13%)    | 8 (21%)    | 4 (11%)         | 3 (8%)            | 1 (3%)                 | 0 (0%)              | 1 (3%)    | 1 (3%)  | 38                      |
| Restroom door                                     | 6 (4%)      | 31 (23%)   | 18 (13%)   | 10 (7%)         | 4 (3%)            | 0 (0%)                 | 5 (4%)              | 3 (2%)    | 4 (3%)  | 137                     |
| Table- kid's playroom                             | 1 (4%)      | 10 (36%)   | 10 (36%)   | 6 (21%)         | 1 (4%)            | 0 (0%)                 | 1 (4%)              | 2 (7%)    | 2 (7%)  | 28                      |
| Table- communal                                   | 1 (3%)      | 3 (9%)     | 0 (0%)     | 0 (0%)          | 0 (0%)            | 0 (0%)                 | 0 (0%)              | 0 (0%)    | 0 (0%)  | 32                      |
| Entry point- front desk                           | 3 (3%)      | 23 (25%)   | 20 (22%)   | 13 (14%)        | 0 (0%)            | 0 (0%)                 | 3 (3%)              | 1 (1%)    | 2 (2%)  | 93                      |
| Kitchen fridge or microwave handle                | 1 (2%)      | 5 (9%)     | 10 (18%)   | 6 (11%)         | 1 (2%)            | 0 (0%)                 | 2 (4%)              | 1 (2%)    | 1 (2%)  | 55                      |
| Kitchen counter                                   | 1 (1%)      | 9 (10%)    | 9 (10%)    | 5 (5%)          | 0 (0%)            | 0 (0%)                 | 1 (1%)              | 0 (0%)    | 0 (0%)  | 91                      |
| Entry point- main entrance door handle            | 1 (1%)      | 7 (9%)     | 18 (23%)   | 9 (12%)         | 5 (6%)            | 1 (1%)                 | 2 (3%)              | 4 (5%)    | 1 (1%)  | 78                      |
| Water cooler or fountain                          | 0 (0%)      | 8 (10%)    | 5 (6%)     | 10 (7%)         | 1 (1%)            | 0 (0%)                 | 2 (2%)              | 5 (6%)    | 2 (2%)  | 83                      |
| Entry point- clinic door handle                   | 1 (0%)      | 1 (2%)     | 4 (8%)     | 2 (4%)          | 0 (0%)            | 0 (0%)                 | 0 (0%)              | 0 (0%)    | 0 (0%)  | 49                      |
| Air                                               | 2 (0%)      | 0 (0%)     | 1 (1%)     | 1 (1%)          | 1 (1%)            | 0 (0%)                 | 0 (0%)              | 0 (0%)    | 0 (0%)  | 99                      |
| Total                                             | 18 (2%)     | 105 (13%)  | 109 (13%)  | 62 (8%)         | 16 (2%)           | 0 (0%)                 | 17 (2%)             | 18 (2%)   | 14 (2%) | 812                     |

**Appendix Table 10.** Comparison of pairwise genetic distances for same shelter and different shelter genome pairs by ANOVA among participants positive for coxsackievirus A21.

| Data Summary      |                    |                |                    |                |         |
|-------------------|--------------------|----------------|--------------------|----------------|---------|
| Groups            | N                  | Mean           | Standard deviation | Standard error |         |
| Same shelter      | 224                | 21.094         | 18.763             | 1.254          |         |
| Different shelter | 517                | 23.501         | 17.476             | 0.769          |         |
| ANOVA Summary     |                    |                |                    |                |         |
| Source            | Degrees of freedom | Sum of squares | Mean square        | F-statistic    | P-value |
| Between groups    | 1                  | 905.617        | 905.617            | 2.835          | 0.093   |
| Within groups     | 739                | 236,098.338    | 319.484            |                |         |
| Total             | 740                | 237,003.955    |                    |                |         |

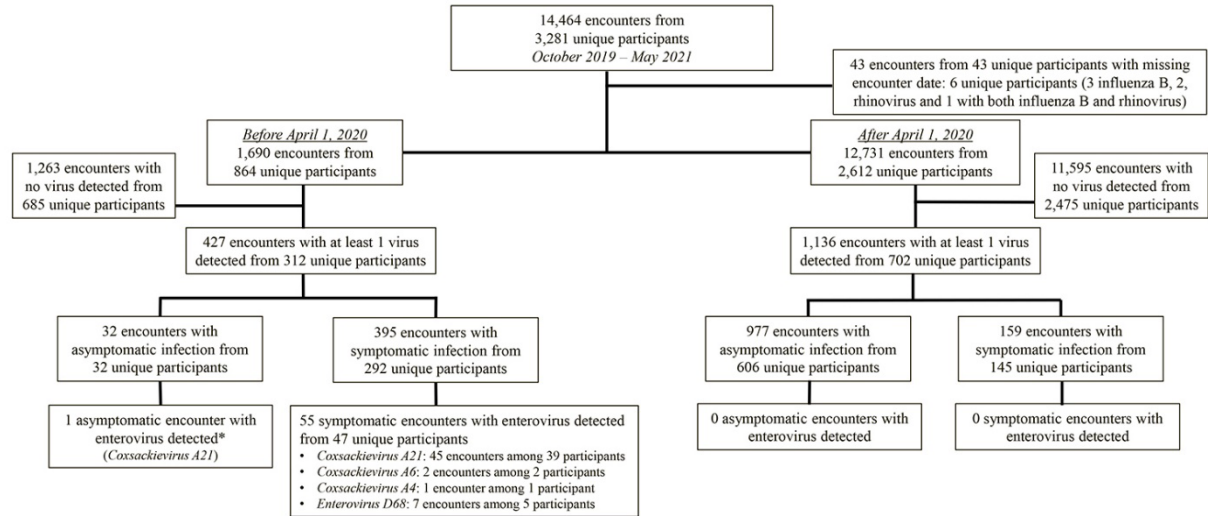

**Appendix Figure 1.** Homeless shelter study flowchart for enterovirus, King County, Washington, USA. \*

\*1 asymptomatic enterovirus encounter was among participant that was pre-symptomatic on their initial encounter, but symptomatic on subsequent encounter (included in 39 symptomatic individuals with coxsackievirus A21)

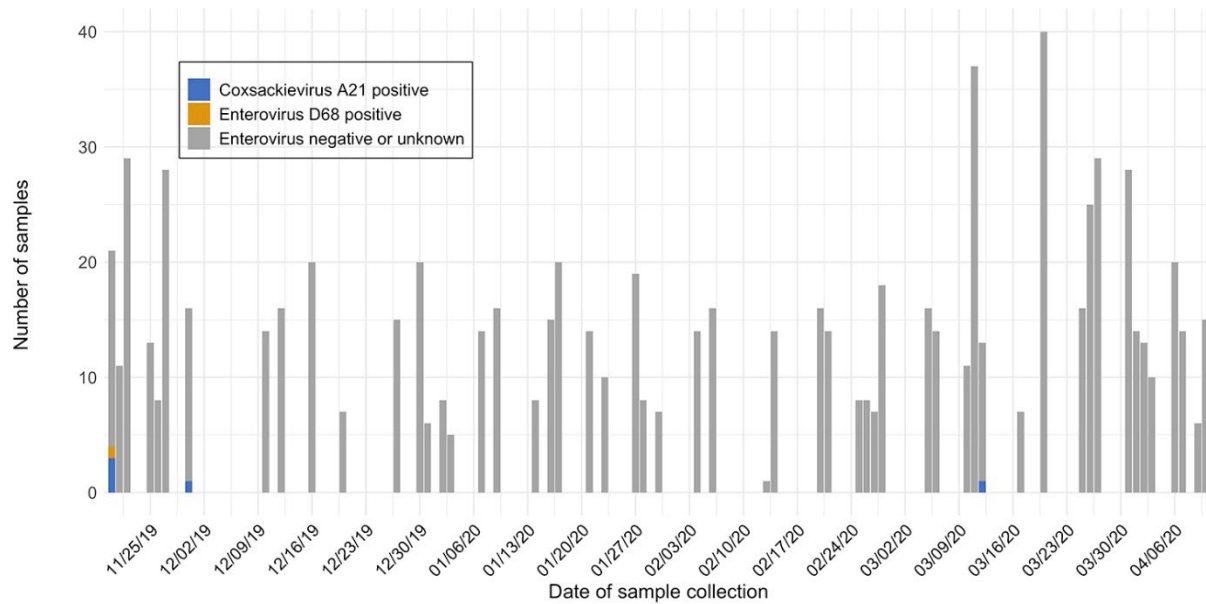

**Appendix Figure 2.** Environmental samples and enterovirus detection in homeless shelters, November 2019 - April 2020, King County, Washington, USA.\* \*Environmental samples included high-touch surfaces (i.e., kitchen counters, front desk, doors, and entrance and restroom doors) and bioaerosol samples. See additional details in the main text methods.

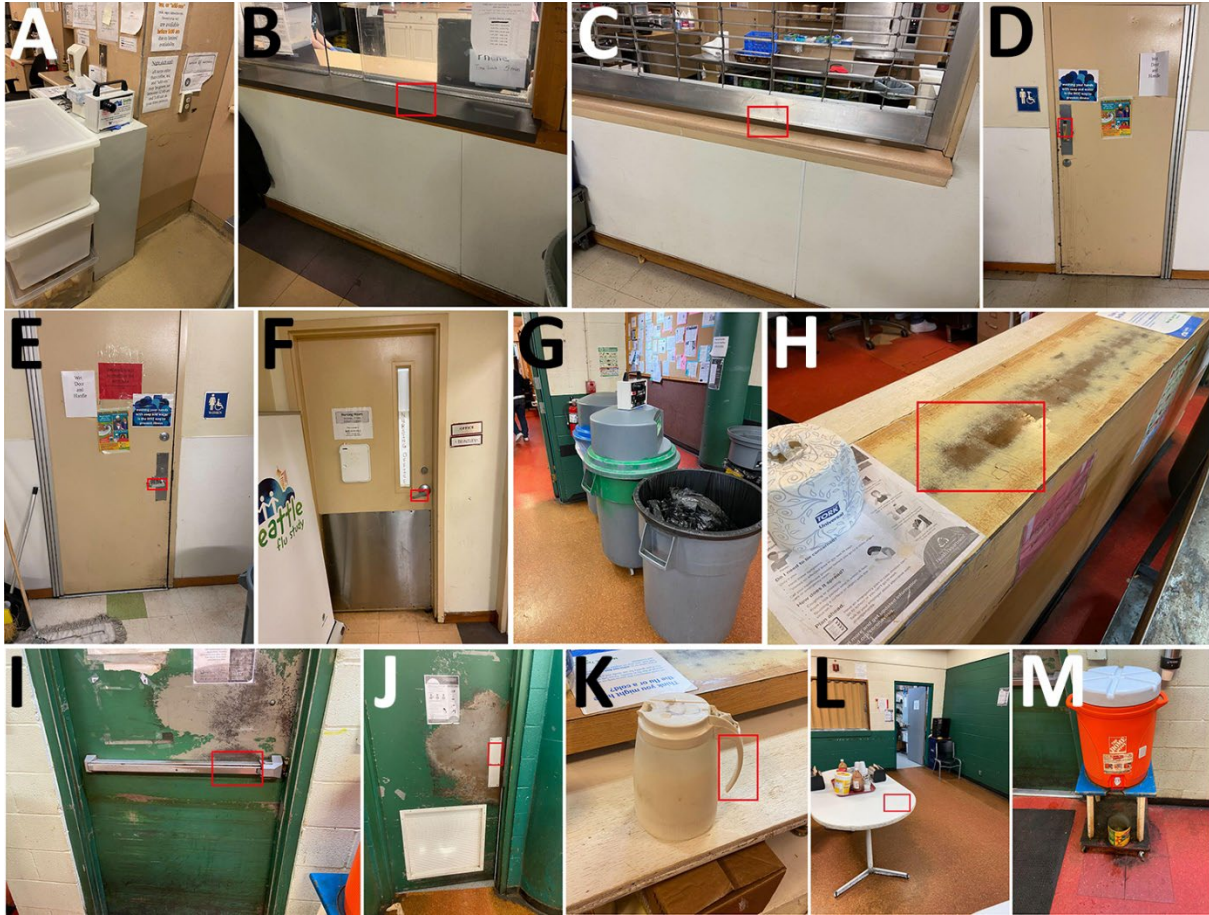

**Appendix Figure 3.** Photos of environmental sampling locations and surfaces. a. Shelter L air pump. b. Shelter L Front desk. c. Shelter L kitchen counter. d. Shelter L men’s bathroom door handle. e. Shelter L women’s bathroom door handle. f. Shelter L nurse’s room door handle. g. Shelter M air pump. h. Shelter M front desk. i. Shelter M front door handle. j. Shelter M men’s bathroom door. k. Shelter M kitchen sugar container handle. l. Shelter M table near kitchen. m. Shelter M water cooler button

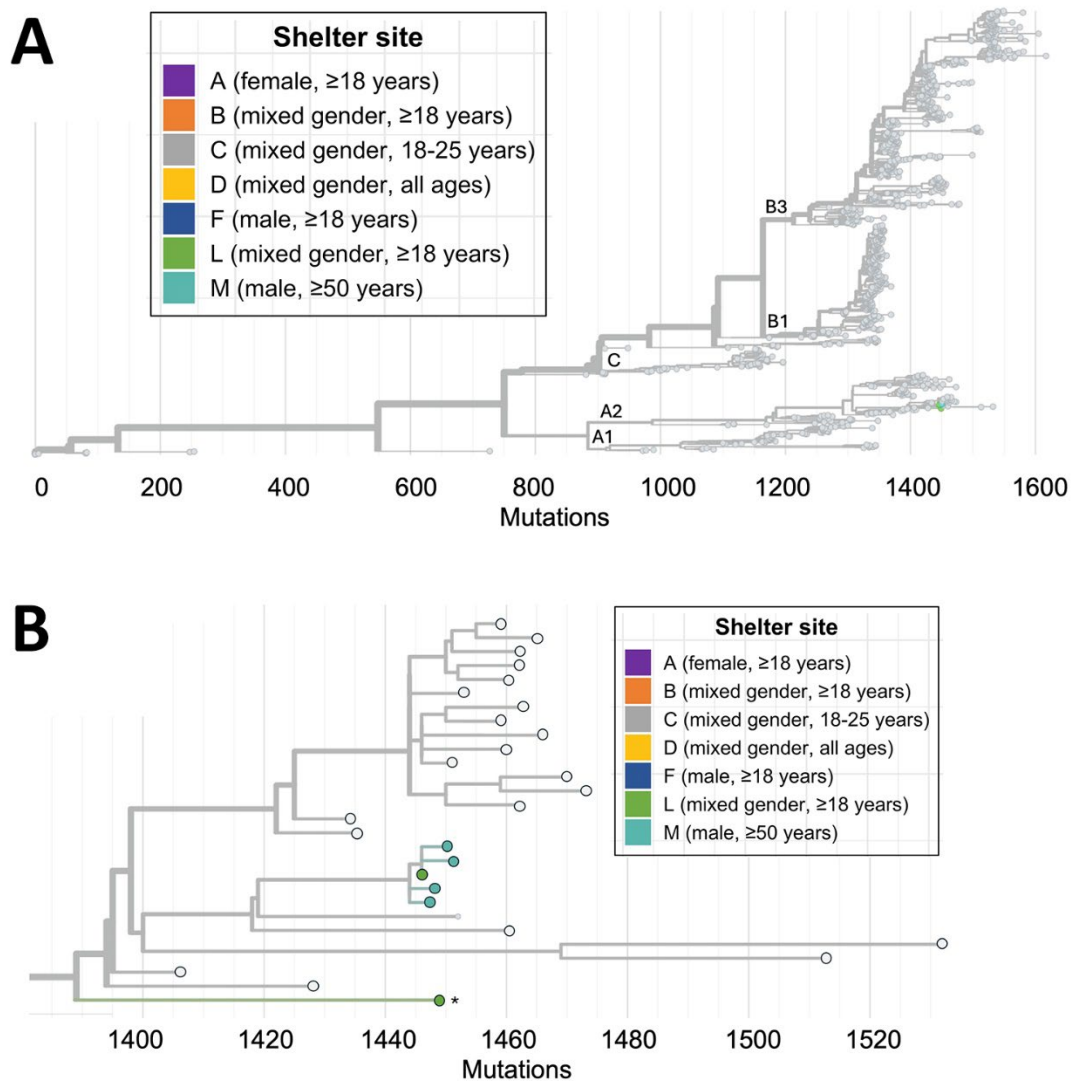

**Appendix Figure 4.** Phylogenetic trees of all sequenced enterovirus D68 shelter swabs. A) Tree containing all shelter enterovirus D68 and all enterovirus D68 genomes deposited in GenBank. Tips representing study samples are colored according to shelter. Light gray tips represent enterovirus D68 genomes downloaded from GenBank. The x-axis represents number of nucleotide changes in the genome relative to a enterovirus D68 reference genome (NC\_038308.1). B) Tree containing all shelter enterovirus D68 genomes. Environmental sample is labeled with an asterisk.

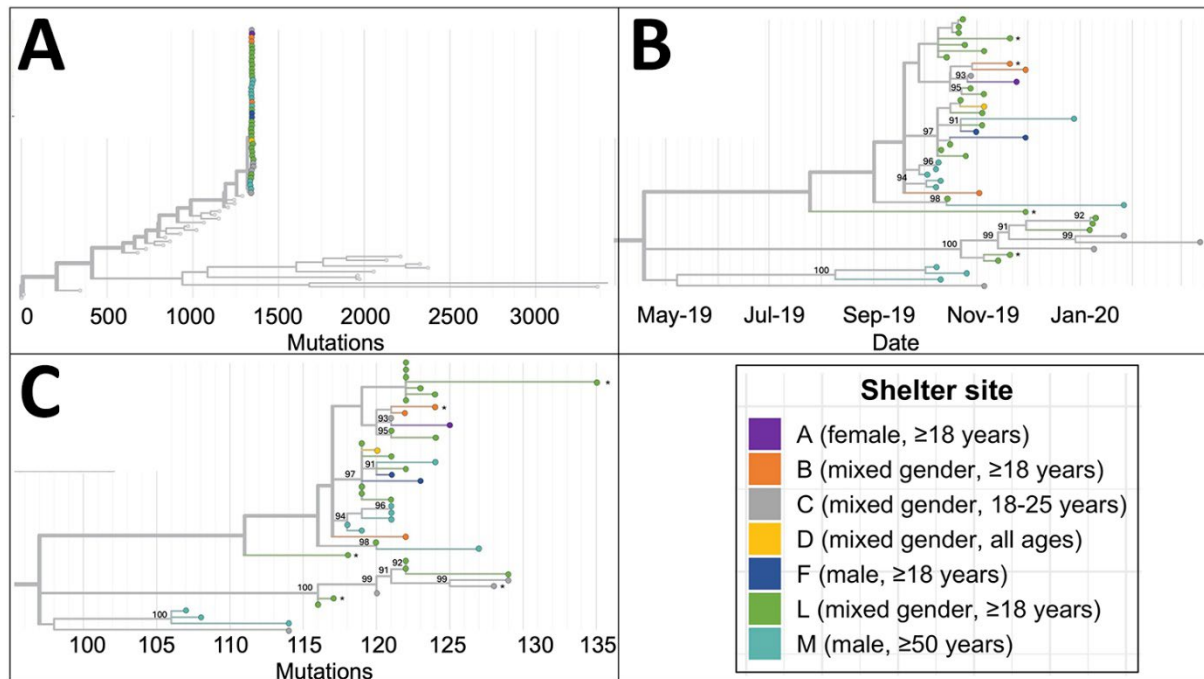

**Appendix Figure 5.** Phylogenetic trees of all sequenced coxsackievirus A21 shelter swabs. A) Tree containing all shelter coxsackievirus A21 and all coxsackievirus A21 genomes deposited in GenBank. Tips representing study samples are colored according to shelter. Light gray tips represent coxsackievirus A21 genomes downloaded from GenBank. The x-axis represents number of nucleotide changes in the genome relative to a coxsackievirus A21 reference genome (AF465515.1). B) Tree containing all shelter coxsackievirus A21 genomes. Internal nodes with >90% bootstrap support are labeled on tree. Environmental samples are labeled with an asterisk. C) Tree containing all shelter coxsackievirus A21 genomes with x-axis corresponding to sample collection date.



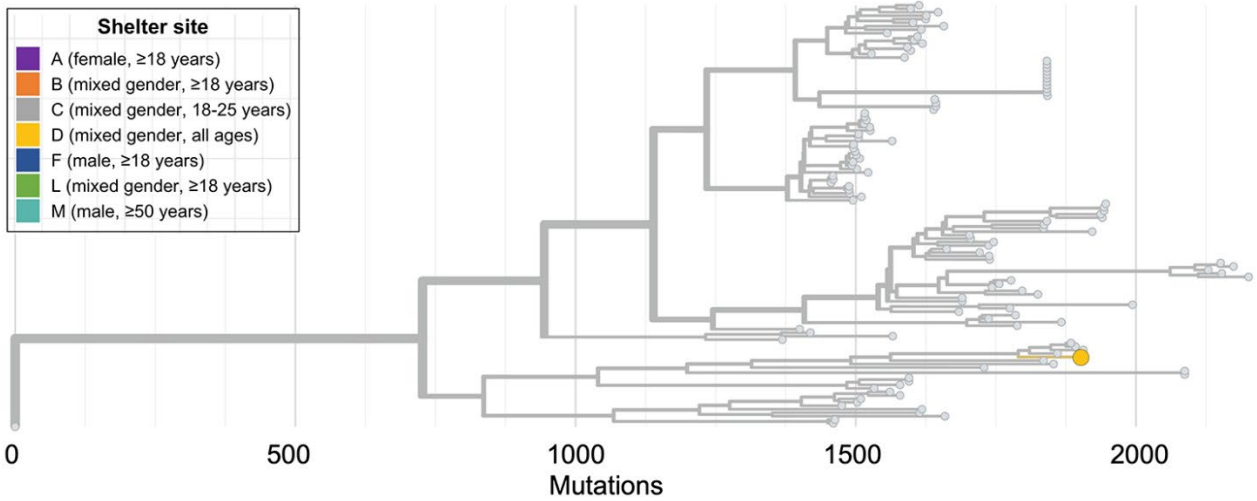

**Appendix Figure 6.** Phylogenetic tree containing sequenced participant coxsackievirus A4 shelter specimen. The tip representing the study specimen is colored according to its shelter of origin. Light gray tips represent coxsackievirus A4 genomes downloaded from GenBank. The x-axis represents number of nucleotide changes in the genome relative to a coxsackievirus A4 reference genome (AY421762.1).

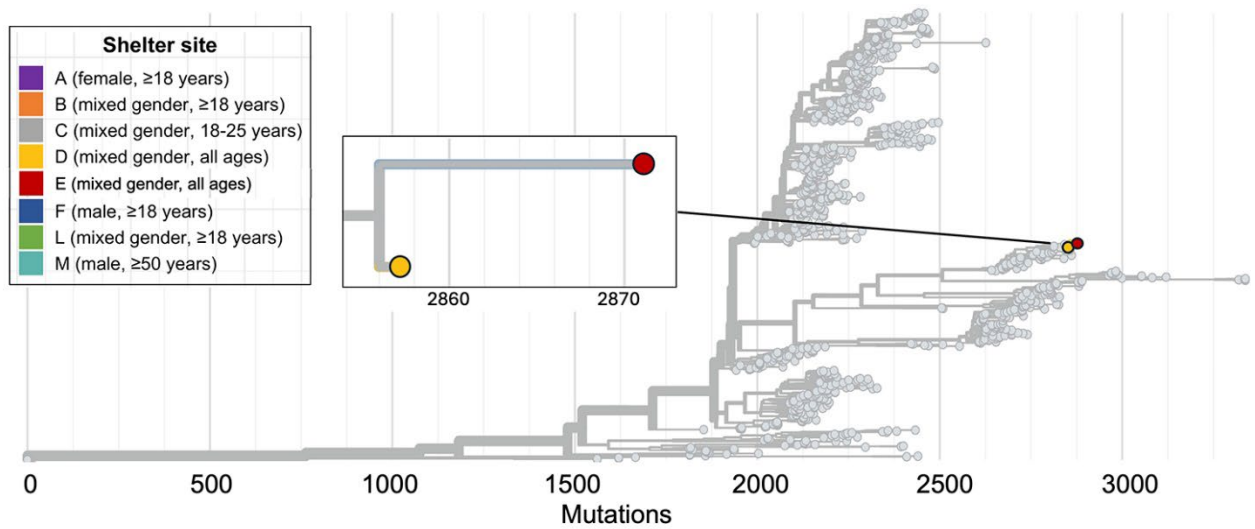

**Appendix Figure 7.** Phylogenetic tree containing sequenced participant coxsackievirus A6 shelter specimens. The tips representing study specimens are colored according to shelter of origin. Light gray tips represent coxsackievirus A6 genomes downloaded from GenBank. The inset shows a detailed view of the relationship among the study genomes. The x-axis represents number of nucleotide changes in the genome relative to a coxsackievirus A6 reference genome (AY421764.1).
